# Supplementary material for: The Social Norms of Suicidal and Self-Harming Behaviours in Scottish Adolescents
Source: PubMed Central journal article supplement (PMC5369143; doi:10.3390/ijerph14030307), 2017-03-15
Supplement: ijerph-14-00307-s001.pdf [file ijerph-14-00307-s001.pdf]

# Supplementary Materials: The Social Norms of Suicidal and Self-Harming Behaviours in Scottish Adolescents

Jody Quigley, Susan Rasmussen and John McAlaney

Table S1. Characteristics of schools and participants from each school.

| School<br>[SIMD<br>decile]*<br>(urban/rural)** | Gender  | Age |    |    |     |    |     |    |         | TOTAL<br>(% of whole<br>sample) |            |
|------------------------------------------------|---------|-----|----|----|-----|----|-----|----|---------|---------------------------------|------------|
|                                                |         | 11  | 12 | 13 | 14  | 15 | 16  | 17 | Missing |                                 |            |
| 1<br>[10]<br>(other urban)                     | Males   |     |    | 5  | 32  | 12 | 15  |    |         |                                 | 64         |
|                                                | Females |     |    | 10 | 22  | 7  | 26  |    | 1       |                                 | 66         |
|                                                | Total   |     |    | 15 | 54  | 19 | 41  |    |         |                                 | 130 (28.5) |
| 2<br>[8]<br>(other urban)                      | Males   |     |    | 5  | 25  |    |     |    |         |                                 | 30         |
|                                                | Females |     |    | 4  | 25  |    |     |    |         |                                 | 29         |
|                                                | Total   |     |    | 9  | 50  |    |     |    |         |                                 | 59 (12.9)  |
| 3<br>[6]<br>(other urban)                      | Males   |     |    |    | 8   | 1  |     |    |         |                                 | 9          |
|                                                | Females |     |    |    | 32  | 2  |     |    |         |                                 | 34         |
|                                                | Total   |     |    |    | 40  | 3  |     |    |         |                                 | 43 (9.4)   |
| 4<br>[9]<br>(large urban)                      | Males   |     |    |    |     | 9  | 30  |    |         |                                 | 39         |
|                                                | Females |     |    |    |     | 7  | 43  | 1  |         |                                 | 51         |
|                                                | Total   |     |    |    |     | 16 | 73  | 1  |         |                                 | 90 (19.7)  |
| 5<br>[5]<br>(large urban)                      | Males   |     | 4  | 25 | 24  | 21 |     |    |         |                                 | 75         |
|                                                | Females | 1   | 5  | 17 | 21  | 14 |     |    |         |                                 | 58         |
|                                                | Missing |     |    |    | 1   |    |     |    | 1       |                                 | 2          |
|                                                | Total   | 1   | 9  | 42 | 46  | 35 |     |    |         | 1                               | 134 (29.4) |
| TOTAL                                          |         | 1   | 9  | 66 | 189 | 73 | 114 | 1  | 3       |                                 | 456        |

\*SIMD decile: 1 = most deprived, 10 = least deprived. \*\*Urban/rural classification based on Scottish Government 6 Fold Urban Rural Classification (large urban = population > 125,000; other urban = 10,000 – 124,999; accessible small town = 3,000 – 9,999 within 30 mins drive of settlement > 10,000; remote small town = 3,000 – 9,999 not within 30 mins of settlement > 10,000; accessible rural = < 3,000 within 30 mins drive of settlement > 10,000; remote rural = < 3,000 not within 30 mins drive of settlement > 10,000).

**Table S2.** Full results of Friedman's ANOVA with post-hoc Wilcoxon signed-ranks to determine difference between perceived and reported norms.

|                                                        | Reported norm<br>Friedman's ANOVA                           | Reference group         | Wilcoxon signed-ranks tests          |                |             |                |
|--------------------------------------------------------|-------------------------------------------------------------|-------------------------|--------------------------------------|----------------|-------------|----------------|
|                                                        |                                                             |                         | Direction<br>of diff. <sup>4,5</sup> | T<br>statistic | P-<br>value | Effect<br>size |
| Descriptive norms                                      | Thoughts of SH <sup>1</sup><br>$X^2(7) = 1402.04, p < .001$ | Friends                 | S < O                                | 2003.00        | .005        | .09            |
|                                                        |                                                             | Parents                 | S > O                                | 225.00         | <.001       | .23            |
|                                                        |                                                             | Family                  | S > O                                | 686.00         | <.001       | .18            |
|                                                        |                                                             | Pupils the same sex/age | S < O                                | 1105.50        | <.001       | .46            |
|                                                        |                                                             | Pupils at same school   | S < O                                | 1511.00        | <.001       | .49            |
|                                                        |                                                             | Pupils in general       | S < O                                | 1249.00        | <.001       | .50            |
|                                                        |                                                             | People in general       | S < O                                | 1293.00        | <.001       | .49            |
|                                                        | SH<br>$X^2(7) = 1440.99, p < .001$                          | Friends                 | S < O                                | 1207.00        | <.001       | .12            |
|                                                        |                                                             | Parents                 | S > O                                | 153.50         | <.001       | .20            |
|                                                        |                                                             | Family                  | S > O                                | 541.00         | <.001       | .13            |
|                                                        |                                                             | Pupils the same sex/age | S < O                                | 817.50         | <.001       | .47            |
|                                                        |                                                             | Pupils at same school   | S < O                                | 672.00         | <.001       | .51            |
|                                                        |                                                             | Pupils in general       | S < O                                | 656.00         | <.001       | .52            |
|                                                        |                                                             | People in general       | S < O                                | 444.00         | <.001       | .52            |
|                                                        | Thoughts of suicide<br>$X^2(7) = 1270.49, p < .001$         | Friends                 | S < O                                | 1161.50        | .943        | .00            |
|                                                        |                                                             | Parents                 | S > O                                | 274.50         | <.001       | .16            |
|                                                        |                                                             | Family                  | S > O                                | 595.50         | <.001       | .10            |
|                                                        |                                                             | Pupils the same sex/age | S < O                                | 950.50         | <.001       | .41            |
|                                                        |                                                             | Pupils at same school   | S < O                                | 1233.50        | <.001       | .44            |
|                                                        |                                                             | Pupils in general       | S < O                                | 1193.00        | <.001       | .48            |
|                                                        |                                                             | People in general       | S < O                                | 1131.50        | <.001       | .50            |
| SA <sup>2</sup><br>$X^2(7) = 1184.28, p < .001$        | Friends                                                     | S < O                   | 199.00                               | .018           | .08         |                |
|                                                        | Parents                                                     | S > O                   | 48.50                                | .052           | .07         |                |
|                                                        | Family                                                      | S < O                   | 172.50                               | .686           | .01         |                |
|                                                        | Pupils the same sex/age                                     | S < O                   | 213.00                               | <.001          | .41         |                |
|                                                        | Pupils at same school                                       | S < O                   | 234.00                               | <.001          | .42         |                |
|                                                        | Pupils in general                                           | S < O                   | 113.50                               | <.001          | .50         |                |
|                                                        | People in general                                           | S < O                   | 80.50                                | <.001          | .53         |                |
| Perm <sup>3</sup> of SH<br>$X^2(7) = 275.14, p < .001$ | Friends                                                     | S > O                   | 1097.50                              | <.001          | .15         |                |
|                                                        | Parents                                                     | S > O                   | 984.00                               | <.001          | .28         |                |
|                                                        | Family                                                      | S > O                   | 1084.00                              | <.001          | .23         |                |
|                                                        | Pupils the same sex/age                                     | S < O                   | 2788.50                              | .595           | .01         |                |
|                                                        | Pupils at same school                                       | S < O                   | 2626.00                              | .150           | .04         |                |
|                                                        | Pupils in general                                           | S < O                   | 2875.50                              | .008           | .01         |                |
|                                                        | People in general                                           | S < O                   | 2662.00                              | .254           | .08         |                |
| Injunctive norms                                       | Perm of SA<br>$X^2(7) = 190.85, p < .001$                   | Friends                 | S > O                                | 702.00         | <.001       | .18            |
|                                                        |                                                             | Parents                 | S > O                                | 595.00         | <.001       | .24            |
|                                                        |                                                             | Family                  | S > O                                | 450.00         | <.001       | .23            |
|                                                        |                                                             | Pupils the same sex/age | S > O                                | 1602.50        | .070        | .07            |
|                                                        |                                                             | Pupils at same school   | S > O                                | 1895.50        | .113        | .06            |

|                   |       |         |      |     |
|-------------------|-------|---------|------|-----|
| Pupils in general | S > O | 2520.50 | .835 | .01 |
| People in general | S < O | 3211.00 | .465 | .03 |

<sup>1</sup> SH = self-harm, <sup>2</sup> SA = suicide attempt, <sup>3</sup> Perm = permissiveness (injunctive norms), <sup>4</sup> S = self (reported norm), <sup>5</sup> O = other (perceived norm).

**Table S3.** Binary logistic regression analyses of all variables tested for associated with reported norms.

| Own reported behavior with model statistics                                                                                                                   | Predictor variables                          | P-value | Odds ratio (OR) | 95% confidence interval for OR |        |
|---------------------------------------------------------------------------------------------------------------------------------------------------------------|----------------------------------------------|---------|-----------------|--------------------------------|--------|
|                                                                                                                                                               |                                              |         |                 | Lower                          | Upper  |
| <i>Model 1:</i><br><i>Thoughts of SH</i> <sup>1</sup><br>X <sup>2</sup> (23) = 103.37,<br>p < .001<br>R <sup>2</sup> = .27 (Cox & Snell), .45<br>(Nagelkerke) | Sex (male)                                   | .238    | 0.594           | 0.250                          | 1.411  |
|                                                                                                                                                               | Age                                          | .793    | 0.948           | 0.638                          | 1.409  |
|                                                                                                                                                               | Friends thoughts of SH                       | .044    | 1.492           | 1.011                          | 2.201  |
|                                                                                                                                                               | Friends SH                                   | .043    | 1.495           | 1.013                          | 2.205  |
|                                                                                                                                                               | Parents thoughts of SH                       | .999    | 4.398E8         | 0.000                          | -      |
|                                                                                                                                                               | Parents SH                                   | 1.00    | 1.437           | 0.000                          | -      |
|                                                                                                                                                               | Family thoughts of SH                        | .068    | 0.218           | 0.042                          | 1.122  |
|                                                                                                                                                               | Family SH                                    | .028    | 5.818           | 1.215                          | 27.873 |
|                                                                                                                                                               | Pupils the same age/sex thoughts of SH       | .088    | 1.681           | 0.926                          | 3.050  |
|                                                                                                                                                               | Pupils the same age/sex SH                   | .911    | 1.028           | 0.633                          | 1.670  |
|                                                                                                                                                               | Pupils at same school thoughts of SH         | .028    | 0.509           | 0.279                          | 0.929  |
|                                                                                                                                                               | Pupils at the same school SH                 | .898    | 1.408           | 0.513                          | 2.141  |
|                                                                                                                                                               | High-school pupils in general thoughts of SH | .406    | 1.368           | 0.653                          | 2.866  |
|                                                                                                                                                               | High- school pupils in general SH            | .744    | 0.884           | 0.423                          | 1.849  |
|                                                                                                                                                               | People in general thoughts of SH             | .179    | 1.536           | 0.821                          | 2.875  |
|                                                                                                                                                               | People in general SH                         | .529    | 0.815           | 0.431                          | 1.540  |
|                                                                                                                                                               | Friends perm of SH                           | .363    | 1.634           | 0.568                          | 4.704  |
|                                                                                                                                                               | Parents perm of SH                           | .080    | 0.168           | 0.023                          | 1.234  |
|                                                                                                                                                               | Family perm of SH                            | .327    | 2.587           | 0.387                          | 17.311 |
|                                                                                                                                                               | Pupils the same age/sex perm of SH           | .384    | 1.864           | 0.458                          | 7.590  |
| Pupils at same school perm of SH                                                                                                                              | .899                                         | 1.112   | 0.217           | 5.694                          |        |
| High-school pupils in general perm of SH                                                                                                                      | .550                                         | 0.639   | 0.148           | 2.771                          |        |
| People in general perm of SH                                                                                                                                  | .803                                         | 1.146   | 0.392           | 3.349                          |        |
| <i>Model 2: SH</i><br>X <sup>2</sup> (23) = 90.94, p < .001<br>R <sup>2</sup> = .24 (Cox & Snell), .47<br>(Nagelkerke)                                        | Sex (male)                                   | .017    | 0.229           | 0.068                          | 0.770  |
|                                                                                                                                                               | Age                                          | .405    | 1.247           | 0.742                          | 2.095  |
|                                                                                                                                                               | Friends thoughts of SH                       | .017    | 1.760           | 1.106                          | 2.800  |
|                                                                                                                                                               | Friends SH                                   | .253    | 1.285           | 0.836                          | 1.974  |
|                                                                                                                                                               | Parents thoughts of SH                       | .000    | 8.782E8         | 0.000                          | -      |
|                                                                                                                                                               | Parents SH                                   | 1.00    | 1.490           | 0.000                          | -      |
|                                                                                                                                                               | Family thoughts of SH                        | .358    | 0.623           | 0.227                          | 1.708  |
|                                                                                                                                                               | Family SH                                    | .055    | 2.891           | 0.976                          | 8.559  |
|                                                                                                                                                               | Pupils the same age/sex thoughts of SH       | .034    | 2.252           | 1.063                          | 4.770  |
|                                                                                                                                                               | Pupils the same age/sex SH                   | .212    | 0.694           | 0.391                          | 1.231  |
|                                                                                                                                                               | Pupils at same school thoughts of SH         | .045    | 0.504           | 0.258                          | 0.983  |
|                                                                                                                                                               | Pupils at same school SH                     | .485    | 0.730           | 0.302                          | 1.766  |
|                                                                                                                                                               | High-school pupils in general thoughts of SH | .462    | 0.722           | 0.304                          | 1.718  |
| High-school pupils in general SH                                                                                                                              | .200                                         | 1.777   | 0.737           | 4.287                          |        |

|                                              |                                                   |       |       |       |        |
|----------------------------------------------|---------------------------------------------------|-------|-------|-------|--------|
|                                              | People in general thoughts of SH                  | .105  | 1.967 | 0.869 | 4.453  |
|                                              | People in general SH                              | .701  | 0.858 | 0.392 | 1.876  |
|                                              | Friends perm of SH                                | .268  | 2.031 | 0.580 | 7.115  |
|                                              | Parents perm of SH                                | .276  | 0.262 | 0.024 | 2.916  |
|                                              | Family perm of SH                                 | .738  | 1.484 | 0.147 | 15.023 |
|                                              | Pupils the same age/sex perm of SH                | .138  | 3.501 | 0.668 | 18.356 |
|                                              | Pupils at same school perm of SH                  | .649  | 0.633 | 0.088 | 4.538  |
|                                              | High-school pupils in general perm of SH          | .524  | 0.571 | 0.102 | 3.195  |
|                                              | People in general perm of SH                      | .739  | 0.802 | 0.220 | 2.923  |
| <i>Model 3:</i>                              | Sex (male)                                        | .343  | 0.629 | 0.241 | 1.641  |
| <i>Thoughts of suicide</i>                   | Age                                               | .096  | 0.693 | 0.450 | 1.068  |
| $X^2(23) = 70.33,$                           | Friends thoughts of suicide                       | <.001 | 3.388 | 1.926 | 5.959  |
| $p < .001.$                                  | Friends SA                                        | .006  | 0.312 | 0.136 | 0.717  |
| $R^2 = .19$ (Cox & Snell), .38 (Nagelkerke)  | Parents thoughts of suicide                       | .533  | 0.575 | 0.101 | 3.277  |
|                                              | Parent SA                                         | .999  | 0.000 | 0.000 | -      |
|                                              | Family thoughts of suicide                        | .861  | 0.922 | 0.369 | 2.299  |
|                                              | Family SA                                         | .802  | 1.228 | 0.248 | 6.085  |
|                                              | Pupils the same age/sex thoughts of suicide       | .066  | 1.650 | 0.967 | 2.816  |
|                                              | Pupils the same age/sex SA                        | .625  | 1.124 | 0.703 | 1.798  |
|                                              | Pupils at same school thoughts of suicide         | .434  | 0.817 | 0.493 | 1.356  |
|                                              | Pupils at same school SA                          | .128  | 0.716 | 0.465 | 1.101  |
|                                              | High-school pupils in general thoughts of suicide | .622  | 0.848 | 0.442 | 1.630  |
|                                              | High-school pupils in general SA                  | .348  | 1.302 | 0.751 | 2.256  |
|                                              | People in general thoughts of suicide             | .103  | 1.497 | 0.922 | 2.430  |
|                                              | People in general SA                              | .285  | 0.791 | 0.515 | 1.216  |
|                                              | Friends perm of SA                                | .313  | 2.121 | 0.492 | 9.146  |
|                                              | Parents perm of SA                                | .088  | 0.144 | 0.016 | 1.336  |
|                                              | Family perm of SA                                 | .287  | 3.015 | 0.395 | 23.007 |
|                                              | Pupils the same age/sex perm of SA                | .072  | 0.174 | 0.026 | 1.166  |
|                                              | Pupils at same school perm of SA                  | .125  | 6.618 | 0.592 | 73.990 |
|                                              | High-school pupils in general perm of SA          | .473  | 0.435 | 0.045 | 4.227  |
|                                              | People in general perm of SA                      | .432  | 1.564 | 0.513 | 4.763  |
| <i>Model 4: SA<sup>2</sup></i>               | Sex (male)                                        | .899  | 1.132 | 0.168 | 7.636  |
| $X^2(23) = 26.45,$                           | Age                                               | .617  | 0.827 | 0.394 | 1.738  |
| $p = .280$                                   | Friends thoughts of suicide                       | .677  | 0.799 | 0.278 | 2.297  |
| $R^2 = .08.$ (Cox & Snell), .33 (Nagelkerke) | Friends SA                                        | .363  | 1.840 | 0.495 | 6.836  |
|                                              | Parents thoughts of suicide                       | .402  | 2.522 | 0.290 | 21.958 |
|                                              | Parent SA                                         | .999  | 0.000 | 0.000 | -      |
|                                              | Family thoughts of suicide                        | .383  | 1.653 | 0.535 | 5.104  |
|                                              | Family SA                                         | .848  | 0.717 | 0.024 | 21.654 |
|                                              | Pupils the same age/sex thoughts of suicide       | .878  | 0.935 | 0.395 | 2.215  |
|                                              | Pupils the same age/sex SA                        | .731  | 0.840 | 0.312 | 2.262  |
|                                              | Pupils at same school thoughts of suicide         | .542  | 1.354 | 0.511 | 3.590  |

|                                             |                                                   |       |         |       |         |
|---------------------------------------------|---------------------------------------------------|-------|---------|-------|---------|
|                                             | Pupils at same school SA                          | .601  | 1.272   | 0.516 | 3.133   |
|                                             | High-school pupils in general thoughts of suicide | .262  | 0.523   | 0.168 | 1.625   |
|                                             | High-school pupils in general SA                  | .520  | 0.702   | 0.238 | 2.065   |
|                                             | People in general thoughts of suicide             | .330  | 1.504   | 0.662 | 3.416   |
|                                             | People in general SA                              | .413  | 1.389   | 0.633 | 3.047   |
|                                             | Friends perm of SA                                | .029  | 29.858  | 1.410 | 632.265 |
|                                             | Parents perm of SA                                | .511  | 0.245   | 0.004 | 16.308  |
|                                             | Family perm of SA                                 | .882  | 0.726   | 0.011 | 49.939  |
|                                             | Pupils the same age/sex perm of SA                | .128  | 0.040   | 0.001 | 2.529   |
|                                             | Pupils at same school perm of SA                  | .115  | 18.856  | 0.487 | 730.160 |
|                                             | High-school pupils in general perm of SA          | .945  | 0.875   | 0.019 | 39.645  |
|                                             | People in general perm of SA                      | .754  | 0.699   | 0.074 | 6.569   |
| <i>Model 5: Perm<sup>3</sup> of SH</i>      | Sex (male)                                        | .010  | 0.428   | 0.225 | 0.814   |
|                                             | Age                                               | .268  | 1.188   | 0.875 | 1.613   |
| $X^2(23) = 77.03, p < .001$                 | Friends thoughts of SH                            | .850  | 1.038   | 0.704 | 1.532   |
|                                             | Friends SH                                        | .334  | 1.242   | 0.801 | 1.925   |
| $R^2 = .38$ (Cox & Snell), .53 (Nagelkerke) | Parents thoughts of SH                            | .999  | 7.984E7 | 0.000 | -       |
|                                             | Parents SH                                        | 1.000 | 1.175   | 0.000 | -       |
|                                             | Family thoughts of SH                             | .083  | 0.337   | 0.099 | 1.151   |
|                                             | Family SH                                         | .078  | 3.530   | 0.866 | 14.381  |
|                                             | Pupils the same age/sex thoughts of SH            | .823  | 1.041   | 0.734 | 1.476   |
|                                             | Pupils the same age/sex SH                        | .705  | 1.069   | 0.758 | 1.506   |
|                                             | Pupils at same school thoughts of SH              | .404  | 1.207   | 0.776 | 1.878   |
|                                             | Pupils at same school SH                          | .800  | 1.062   | 0.668 | 1.686   |
|                                             | High-school pupils in general thoughts of SH      | .592  | 0.881   | 0.554 | 1.401   |
|                                             | High-school pupils in general SH                  | .878  | 1.040   | 0.632 | 1.710   |
|                                             | People in general thoughts of SH                  | .176  | 0.763   | 0.516 | 1.129   |
|                                             | People in general SH                              | .820  | 1.053   | 0.677 | 1.637   |
|                                             | Friends perm of SH                                | .003  | 4.363   | 1.650 | 11.540  |
|                                             | Parents perm of SH                                | .865  | 1.179   | 0.179 | 7.779   |
|                                             | Family perm of SH                                 | .749  | 1.338   | 0.225 | 7.940   |
|                                             | Pupils the same age/sex perm of SH                | .500  | 1.466   | 0.482 | 4.460   |
|                                             | Pupils at same school perm of SH                  | .733  | 1.264   | 0.329 | 4.865   |
|                                             | High-school pupils in general perm of SH          | .232  | 0.480   | 0.145 | 1.596   |
|                                             | People in general perm of SH                      | .011  | 3.494   | 1.336 | 9.138   |
| <i>Model 6: Perm of SA</i>                  | Sex (male)                                        | .004  | 0.345   | 0.169 | 0.706   |
|                                             | Age                                               | .160  | 1.267   | 0.910 | 1.764   |
| $X^2(23) = 203.71, p < .001$                | Friends thoughts of suicide                       | .965  | 1.014   | 0.555 | 1.853   |
| $R^2 = .47$ (Cox & Snell), .63 (Nagelkerke) | Friends SA                                        | .757  | 0.875   | 0.376 | 2.037   |
|                                             | Parents thoughts of suicide                       | .999  | 9.533E9 | 0.000 | -       |
|                                             | Parent SA                                         | .999  | 0.000   | 0.000 | -       |
|                                             | Family thoughts of suicide                        | .855  | 1.065   | 0.544 | 2.083   |
|                                             | Family SA                                         | .823  | 1.213   | 0.225 | 6.544   |
|                                             | Pupils the same age/sex thoughts of suicide       | .037  | 1.590   | 1.029 | 2.458   |

|                                                   |      |        |       |         |
|---------------------------------------------------|------|--------|-------|---------|
| Pupils the same age/sex SA                        | .365 | 0.836  | 0.567 | 1.232   |
| Pupils at same school thoughts of suicide         | .979 | 0.994  | 0.637 | 1.552   |
| Pupils at same school SA                          | .152 | 1.298  | 0.909 | 1.853   |
| High-school pupils in general thoughts of suicide | .322 | 0.779  | 0.476 | 1.277   |
| High-school pupils in general SA                  | .517 | 0.873  | 0.578 | 1.318   |
| People in general thoughts of suicide             | .108 | 1.395  | 0.930 | 2.093   |
| People in general SA                              | .286 | 0.816  | 0.562 | 1.185   |
| Friends perm of SA                                | .003 | 6.208  | 1.853 | 20.797  |
| Parents perm of SA                                | .127 | 0.195  | 1.853 | 1.596   |
| Family perm of SA                                 | .001 | 29.308 | 3.895 | 220.554 |
| Pupils the same age/sex perm of SA                | .067 | 5.806  | 0.882 | 38.209  |
| Pupils at same school perm of SA                  | .999 | 1.001  | 0.138 | 7.257   |
| High-school pupils in general perm of SA          | .285 | 0.358  | 0.055 | 2.354   |
| People in general perm of SA                      | .658 | 1.222  | 0.503 | 2.969   |

<sup>1</sup> SH = self-harm, <sup>2</sup> SA = suicide attempt, <sup>3</sup> Perm = permissiveness (injunctive norms).

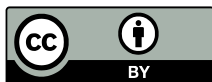

© 2017 by the authors; licensee MDPI, Basel, Switzerland. This article is an open access article distributed under the terms and conditions of the Creative Commons Attribution (CC-BY) license (<http://creativecommons.org/licenses/by/4.0/>).
